# Supplementary material for: Retrieval of aerosol optical properties over Beijing: a comparison between SKYNET and AERONET
Source: Copernicus journal article supplement (doi:10.5194/amt-2019-339), 2019-09-23
Supplement: Supplementary file 1 [file amt-2019-339-supplement.pdf]

**Supplementary Information for**

**Retrieval of aerosol optical properties over Beijing: a comparison  
between SKYNET and AERONET**

Xianyi Yang<sup>1,2</sup>, Huizheng Che<sup>2</sup>, Hitoshi Irie<sup>3</sup>, Quanliang Chen<sup>1</sup>, Ke Gui<sup>2</sup>, Ying Cai<sup>3</sup>,  
Yu Zheng<sup>2</sup>, Linchang An<sup>4</sup>, Hujia Zhao<sup>2</sup>, Lei Li<sup>2</sup>, Yuanxin Liang<sup>2</sup>, Yaqiang Wang<sup>2</sup>,  
Hong Wang<sup>2</sup>, Xiaoye Zhang<sup>2</sup>

<sup>1</sup>Plateau Atmospheric and Environment Laboratory of Sichuan Province, College of Atmospheric Science, Chengdu University of Information Technology, Chengdu 610225, China

<sup>2</sup>State Key Laboratory of Severe Weather (LASW), Institute of Atmospheric Composition, Chinese Academy of Meteorological Sciences, Beijing 100081, China

<sup>3</sup>Center for Environmental Remote Sensing, Chiba University, Chiba, Japan

<sup>4</sup>National Meteorological Center, CMA, Beijing 100081, China

*Correspondence to:* Huizheng Che (chehz@cma.gov.cn)

**This file includes:**

Figure S1 to S4

**Supplementary Figure captions:**

**Figure S1:** Comparison of SSA values retrieved from SKYNET (SR-CEReS) with SSA values retrieved after adjusting the SVA by a 1% step size at the 400-, 500- and 670-nm channels. Panels (a1–a3) and (b1–b3) show the decreases and increases in the SVA, respectively.

**Figure S2:** Comparison of SSA values retrieved from SKYNET (SR-CEReS) with SSA values retrieved after adjusting the SA by a 0.01 step size at the 400-, 500- and 670-nm channels. Panels (a1–a3) and (b1–b3) show the decreases and increases in the SA, respectively.

**Figure S3:** Daily averaged wind fields at (a) 850 hpa and (b) the surface in Beijing from 27 December 2016 to 9 January 2017 based on the ERA-Interim data.

**Figure S4:** Vertical variation of aerosol subtypes from the CALIPSO satellite products on 30 December 2016.

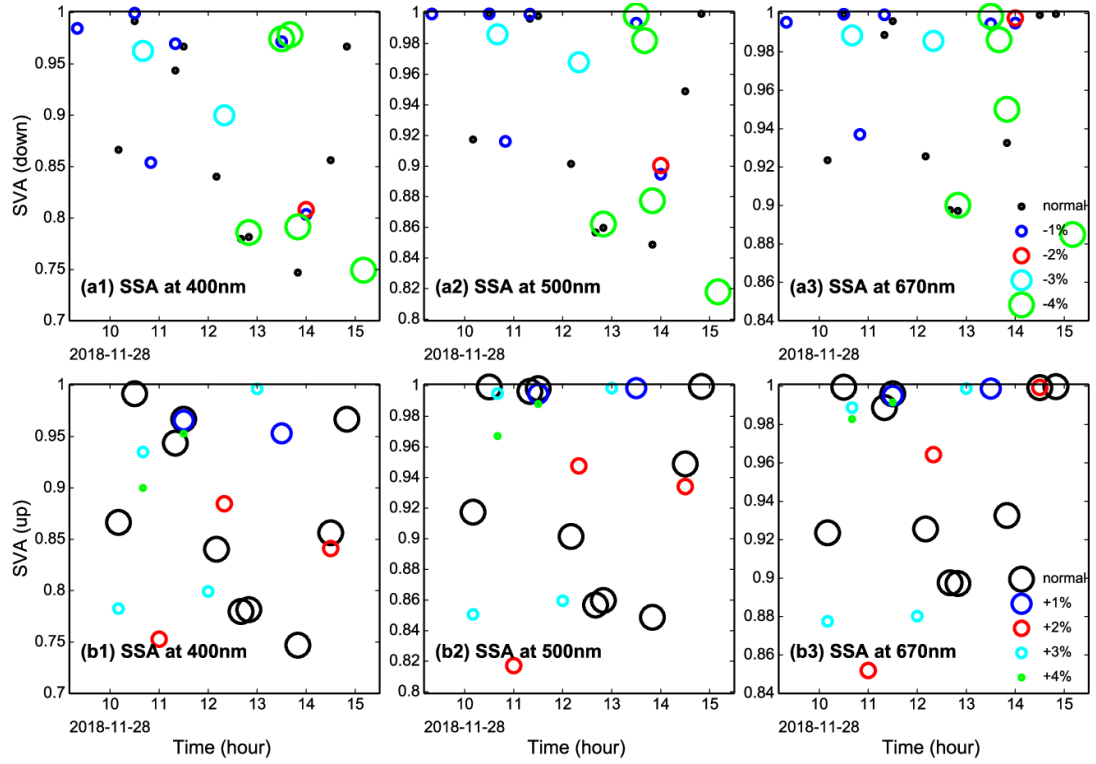

**Figure S1:** Comparison of SSA values retrieved from SKYNET (SR-CEReS) with SSA values retrieved after adjusting the SVA by a 1% step size at the 400-, 500- and 670-nm channels. Panels (a1–a3) and (b1–b3) show the decreases and increases in the SVA, respectively.

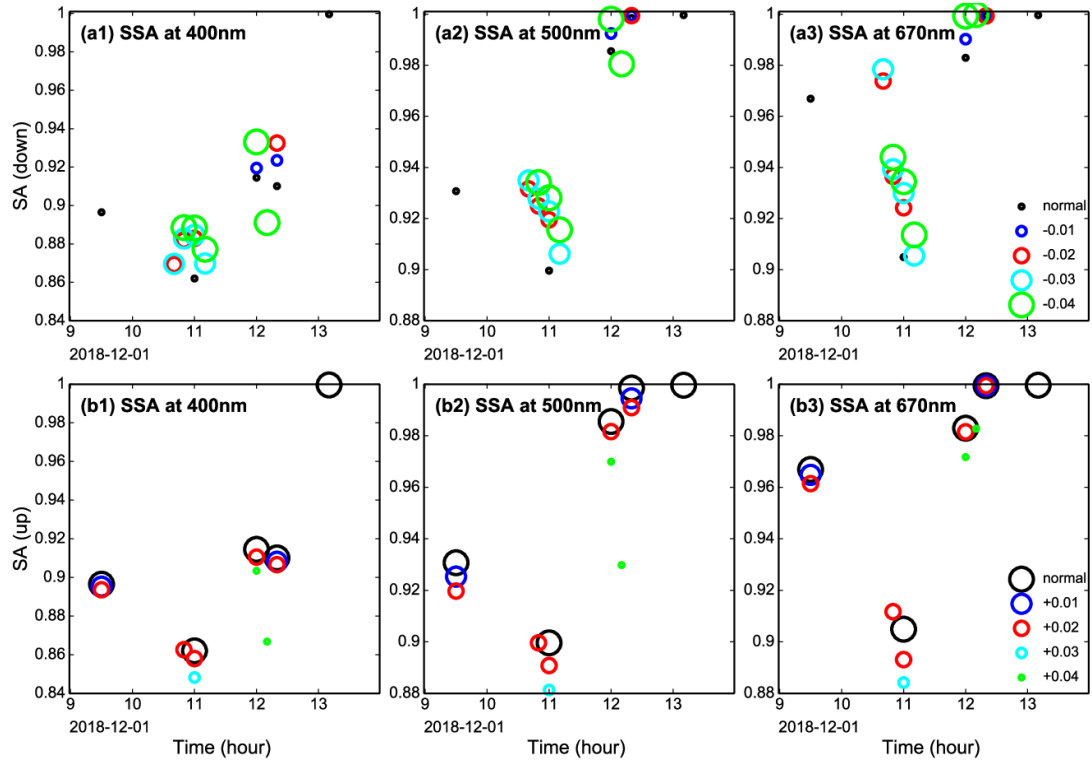

**Figure S2: Comparison of SSA values retrieved from SKYNET (SR-CEReS) with SSA values retrieved after adjusting the SA by a 0.01 step size at the 400-, 500- and 670-nm channels. Panels (a1–a3) and (b1–b3) show the decreases and increases in the SA, respectively.**

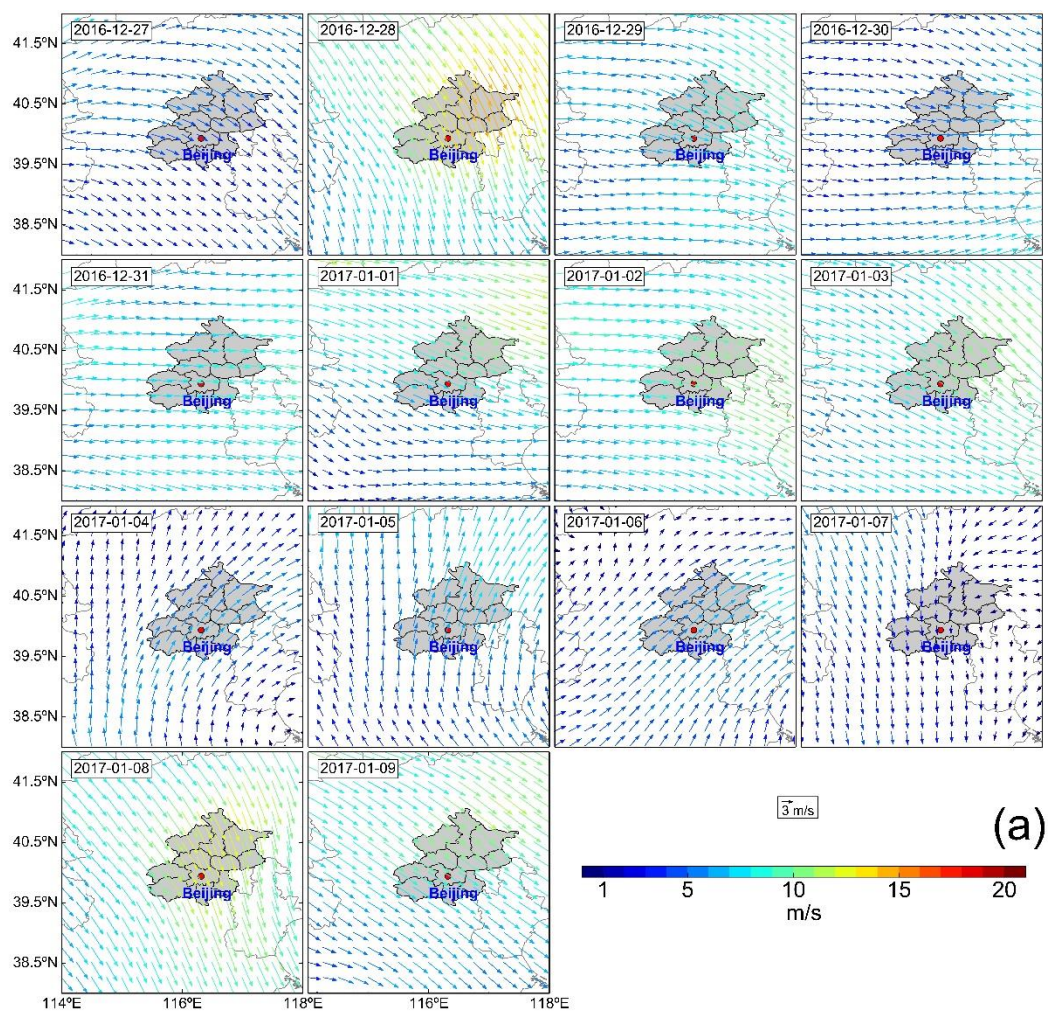



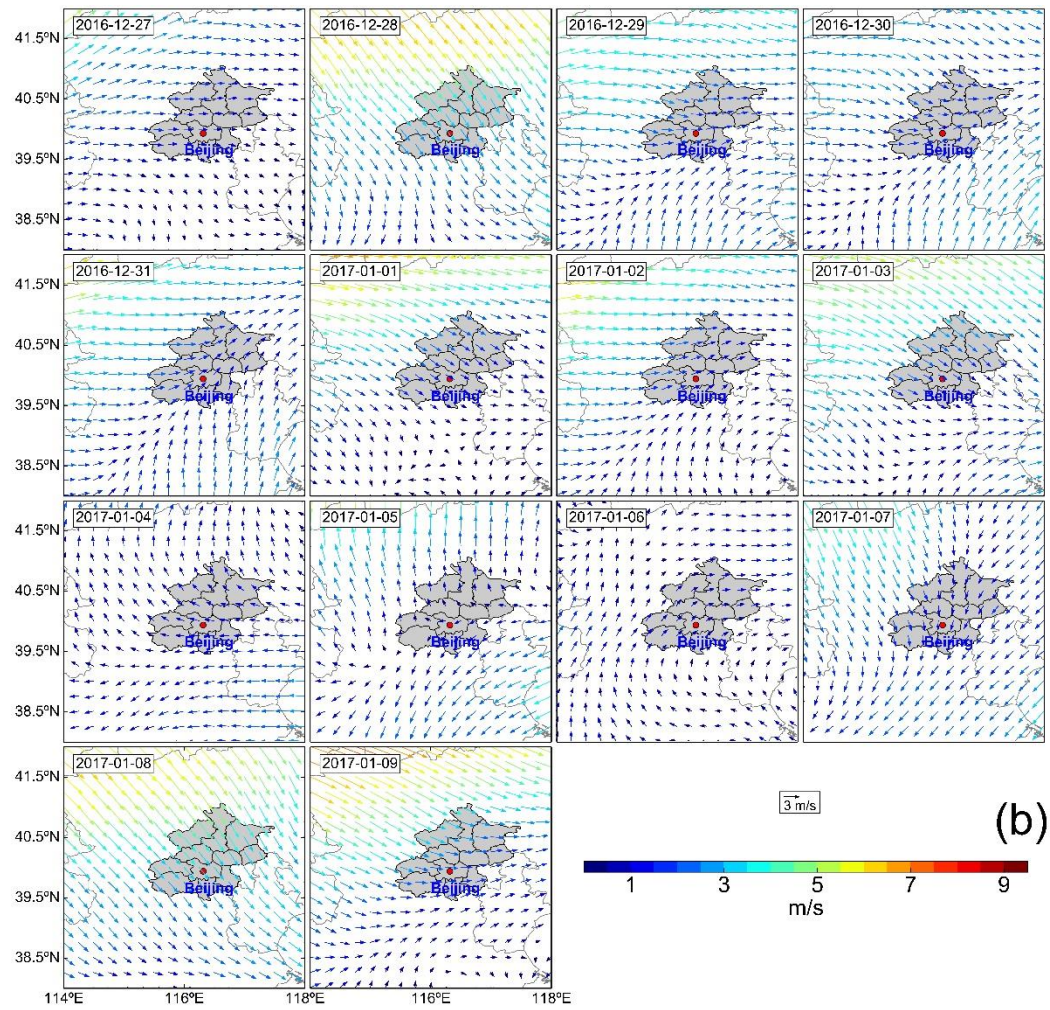

**Figure S3: Daily averaged wind fields at (a) 850 hpa and (b) the surface in Beijing from 27 December 2016 to 9 January 2017 based on the ERA-Interim data.**

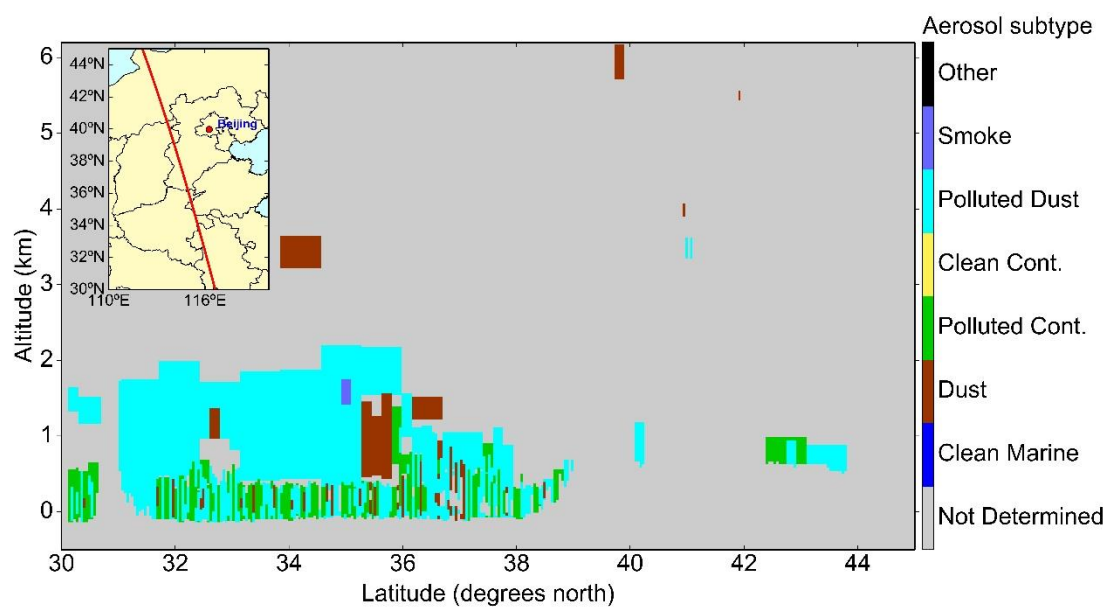

**Figure S4: Vertical variation of aerosol subtypes from the CALIPSO satellite products on 30 December 2016.**
